# Supplementary material for: Tuned synthesis of doped rare-earth orthovanadates for enhanced luminescence
Source: Royal Society of Chemistry journal article supplement (doi:10.1039/c3ra44979c), 2013-11-05

### Supporting Information

Figure S1. a) TEM image of *m*-LaVO<sub>4</sub> nanoparticles along with SAED pattern as inset, b) corresponding HRTEM image [Experimental conditions: T=210°C, t=4h, pH=9].

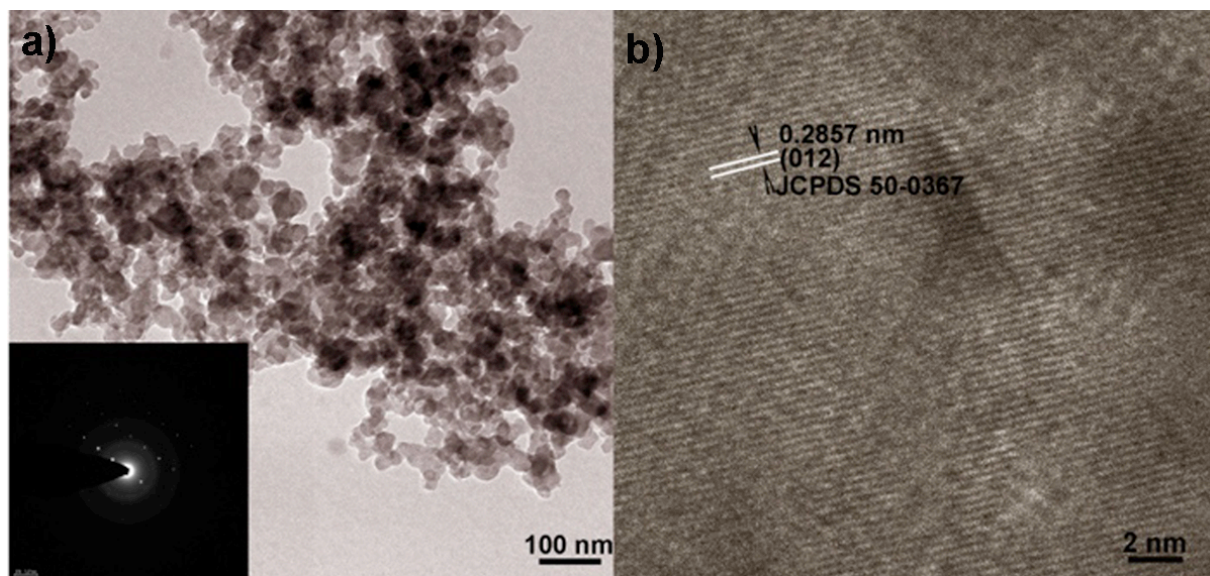

Figure S2. XRD pattern of  $\text{LaVO}_4$ , synthesized in the absence of catechin hydrate: a) without addition of dopant (b) employing  $\text{Gd}^{3+}$  as dopant (Experimental conditions:  $[T=210^\circ\text{C}, t=4\text{h}, \text{pH}=9]$ ).

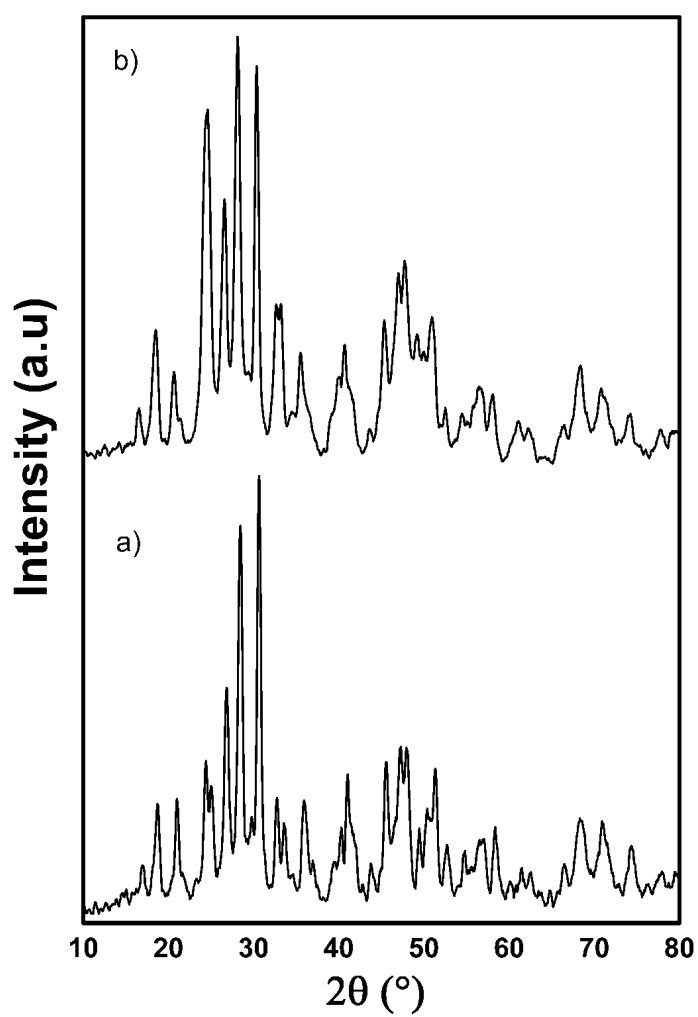

Figure S3. TEM image of  $\text{Gd}^{3+}$  doped  $m\text{-LaVO}_4$  nanoparticles [Experimental conditions:  $T=210^\circ\text{C}$ ,  $t=4\text{h}$ ,  $\text{pH}=9$ ].

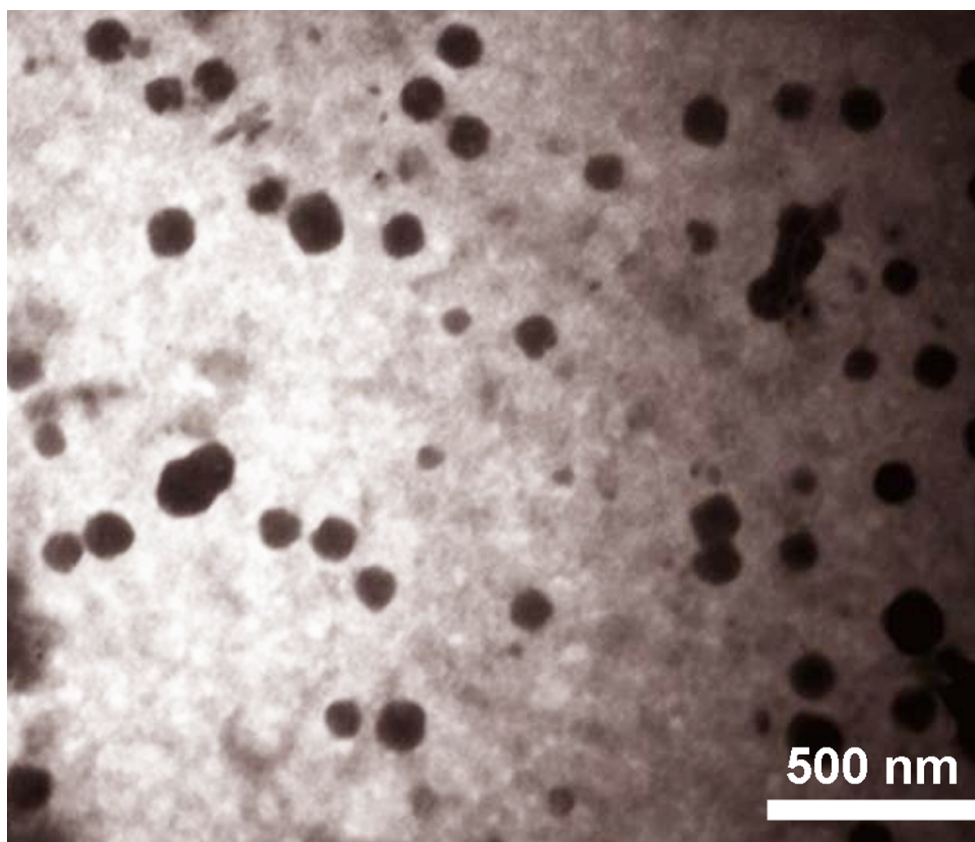

Figure S4. XRD patterns of evolution for *t*-LaVO<sub>4</sub> nanoparticles with [cat<sup>4+</sup>]/[La<sup>3+</sup>] = 1/20 for 24 h at (a) 80°C, (b) 120°C, (c) 150°C, (d) 180°C, (e) 210°C, (f) 240°C [pH=9].

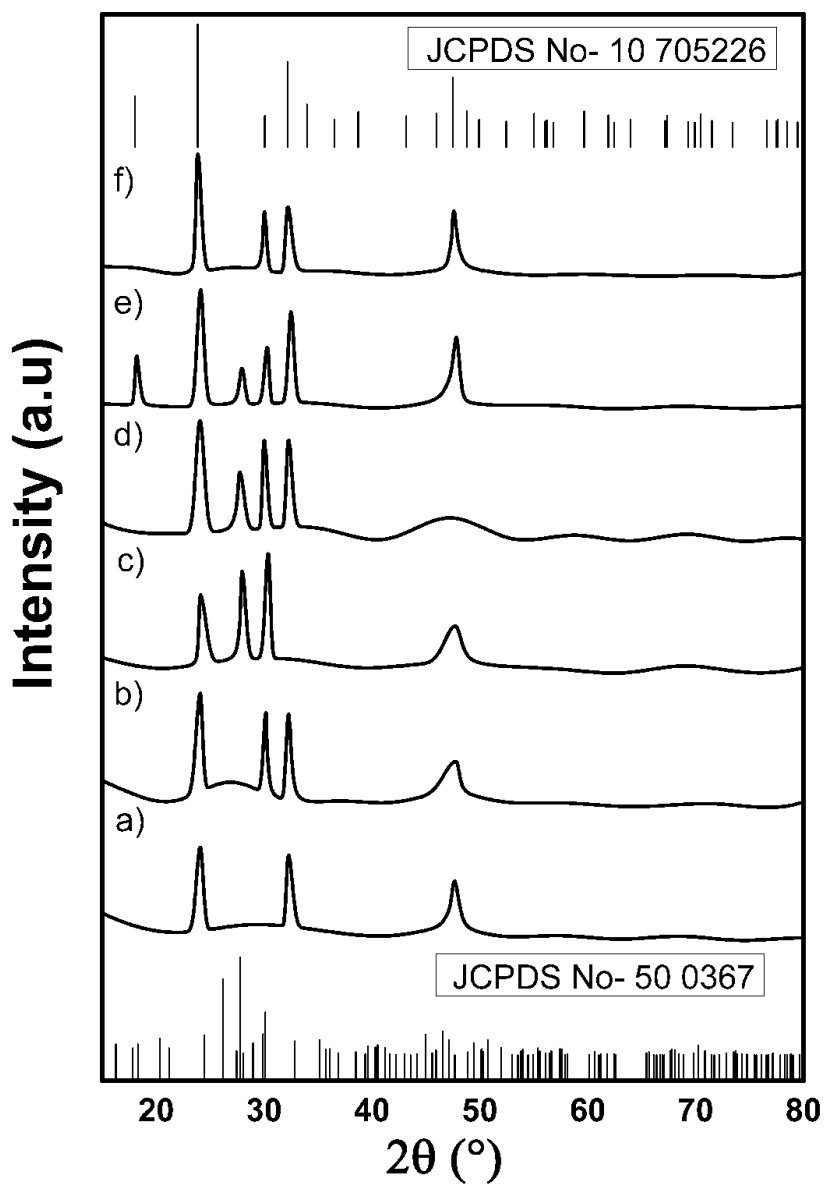



Figure S5. XRD patterns of evolution for *t*-LaVO<sub>4</sub> nanoparticles were [cat<sup>4+</sup>]/[La<sup>3+</sup>] = 1/20 for (a) room temperature and at 210°C for (b) 30min, (c) 1 h, (d) 2 h, (e) 4 h, (f) 5 h [pH=9].

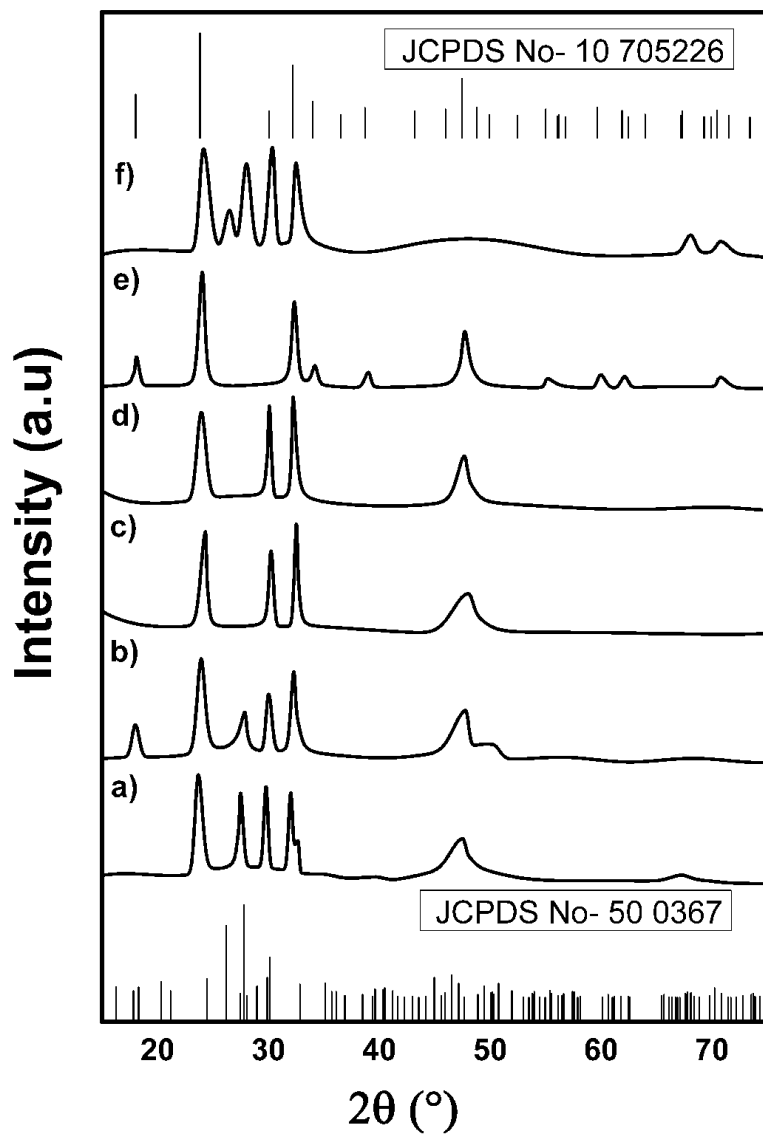

Figure S6. EDAX spectra and composition of Gd<sup>3+</sup> doped LaVO<sub>4</sub> nanoparticles (Experimental conditions: [cat<sup>4+</sup>]/[La<sup>3+</sup>] = 1/20, T=210°C, t=4h, pH=7).

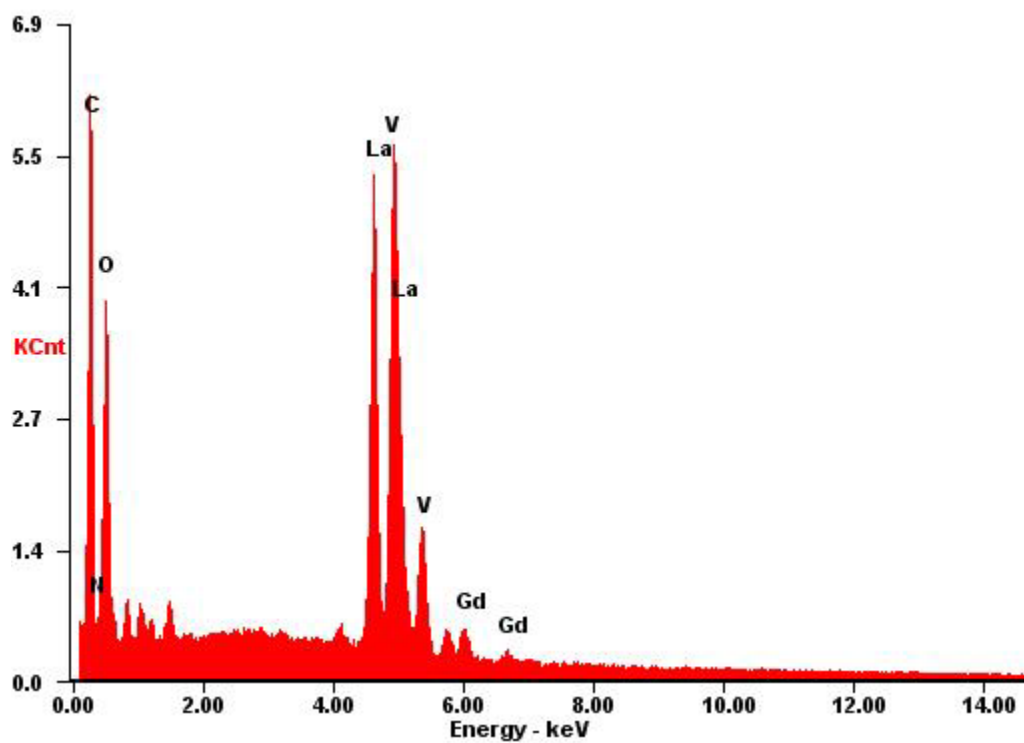

Figure S7. TEM image along with SAED pattern (inset) for a) pH 9.0 and b) pH 13.0. Corresponding HRTEM images are presented as a' and b'. At pH 13.0 a mixture of phases has been observed as indicated in b'' (Experimental conditions:  $[\text{cat}^{4+}]/[\text{La}^{3+}] = 1/20$ ,  $T=210^\circ\text{C}$ ,  $t=4\text{h}$ ).

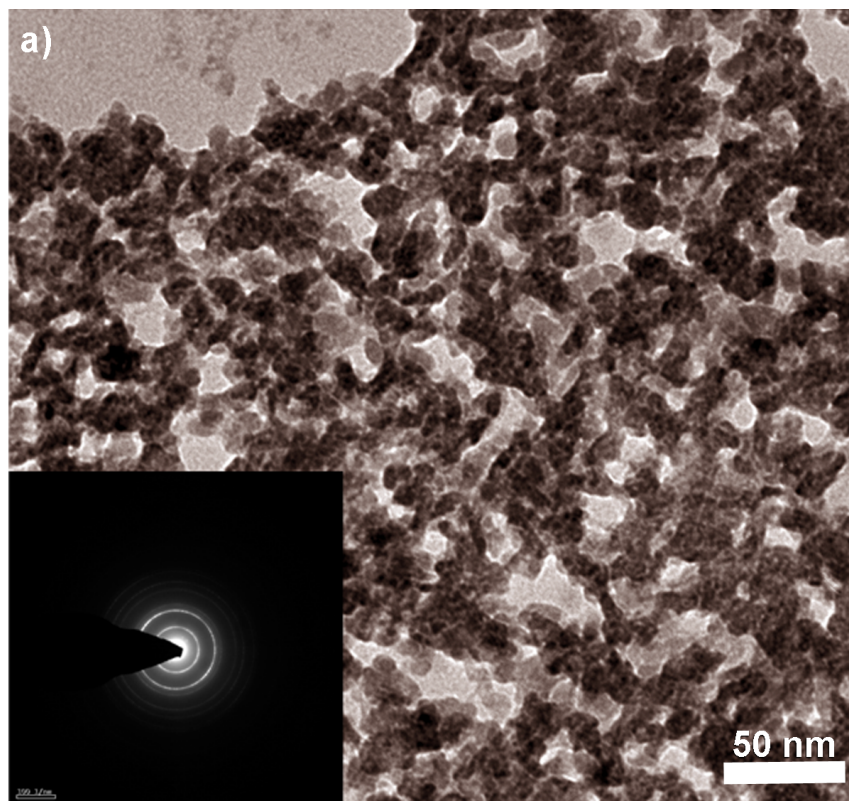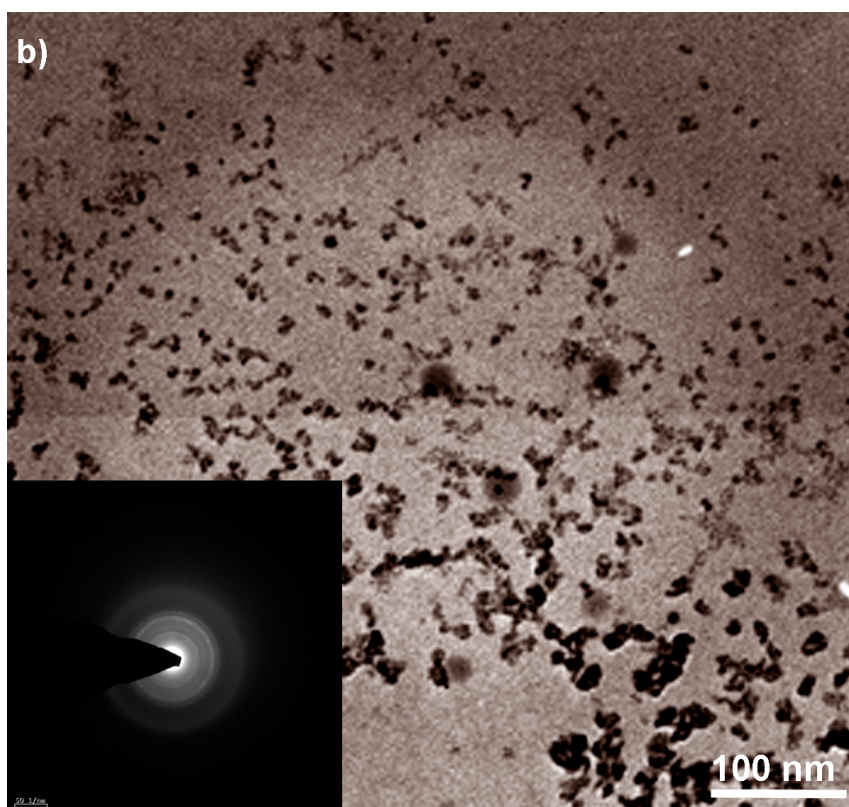



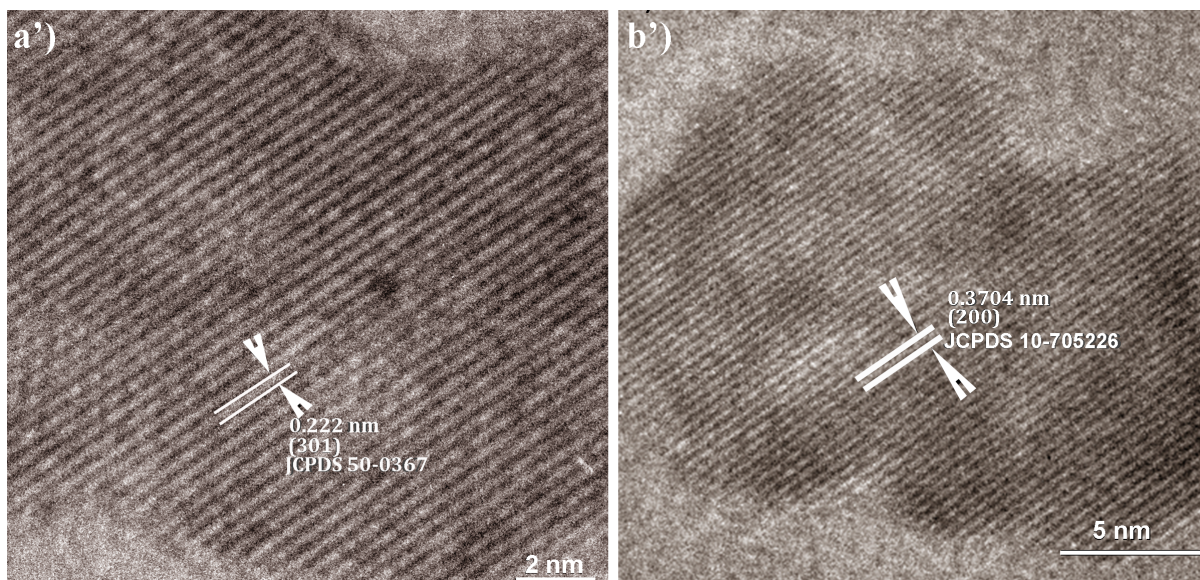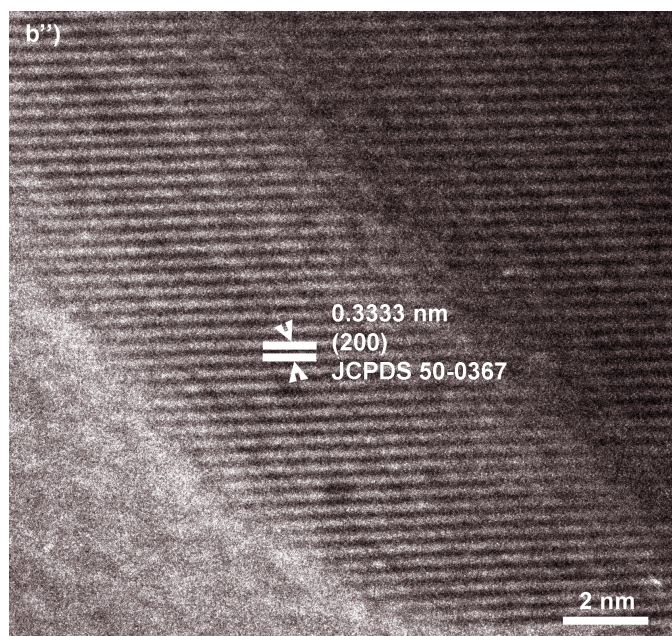



**Figure S8.** TEM images of Gd<sup>3+</sup> doped LaVO<sub>4</sub> nanoparticles synthesized at a) pH 9.0; b) pH 13.0 (Experimental conditions: [cat<sup>4+</sup>]/[La<sup>3+</sup>]=1/20, T=210°C, t=4h).

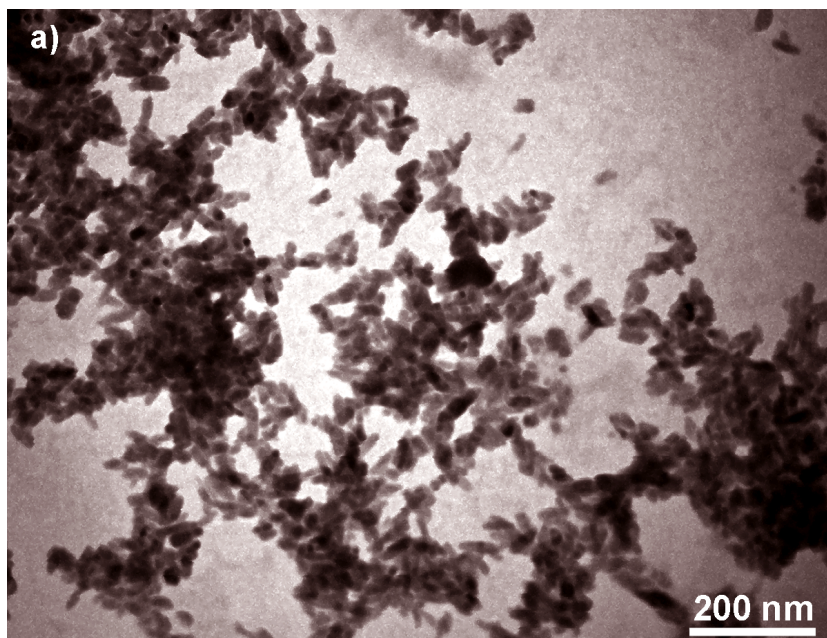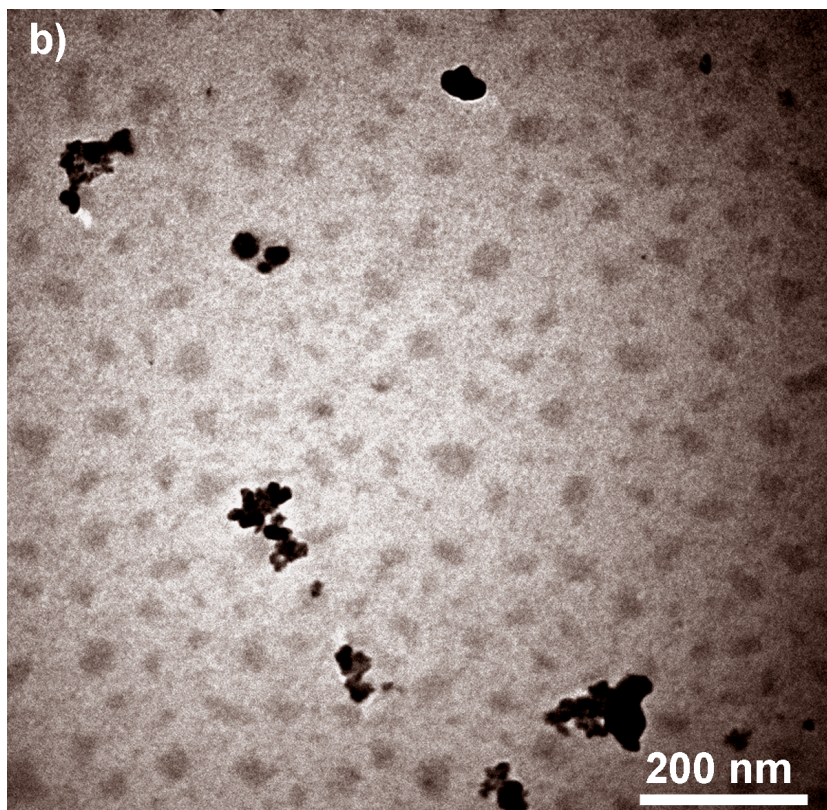

Figure S9. Size distribution by intensity plot for  $\text{LaVO}_4$  nanoparticles in the presence (green line) and absence (black line) of catechin hydrate (Experimental conditions:  $T=210^\circ\text{C}$ ,  $t=4\text{h}$ ).

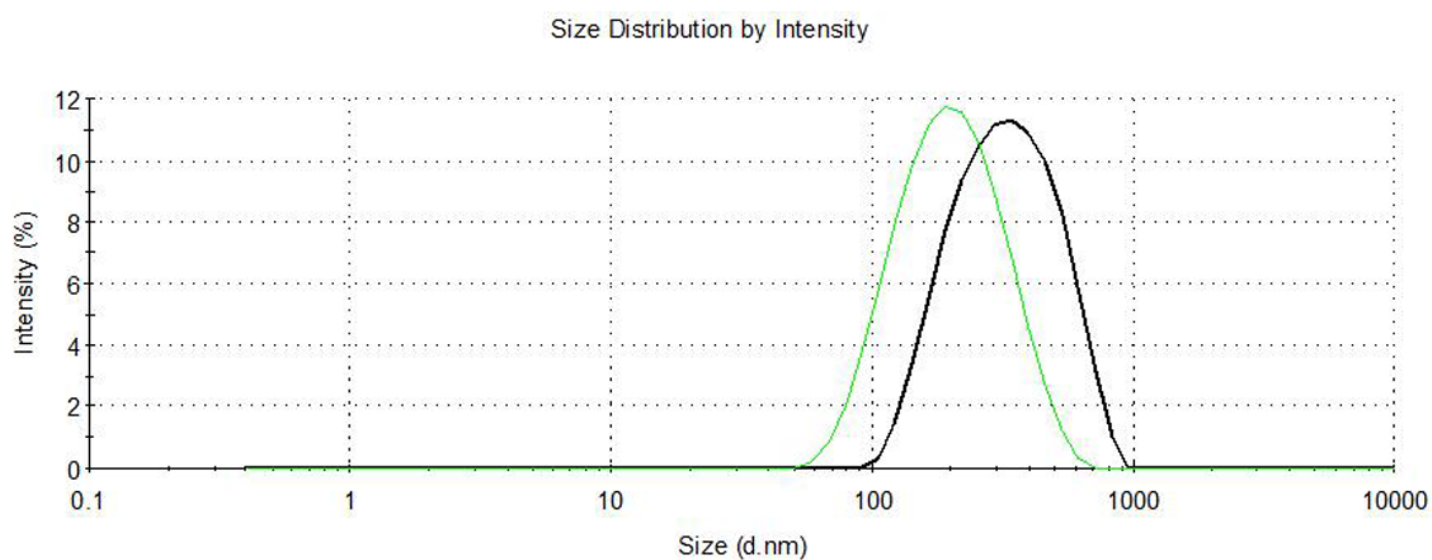

Figure S10. FT- IR spectra of 1) catechin hydrate and as – obtained 2) monoclinic 3) tetragonal  $\text{LaVO}_4$  nanoparticles (Experimental conditions:  $T=210^\circ\text{C}$ ,  $t=4\text{h}$ ).

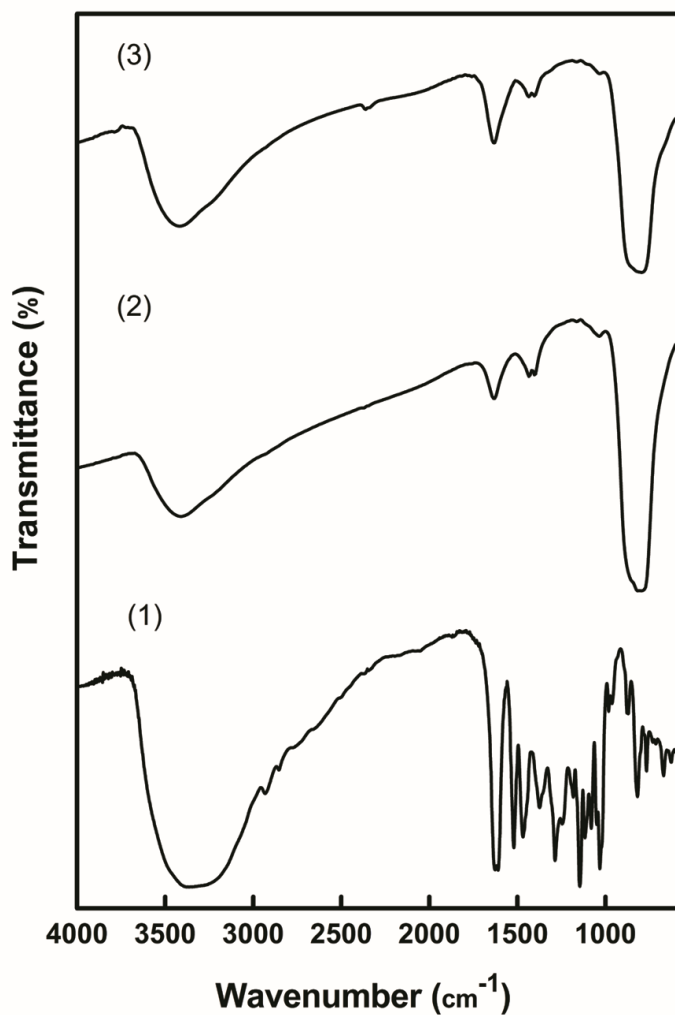



Figure S11. Zeta potential as a function of pH for  $\text{LaVO}_4$  nanoparticles. The red line represents  $t\text{-LaVO}_4$  and blue line  $m\text{-LaVO}_4$  (Experimental conditions:  $T=210^\circ\text{C}$ ,  $t=4\text{h}$ ). The corresponding isoelectric point is marked as green for  $t\text{-LaVO}_4$  and black for  $m\text{-LaVO}_4$

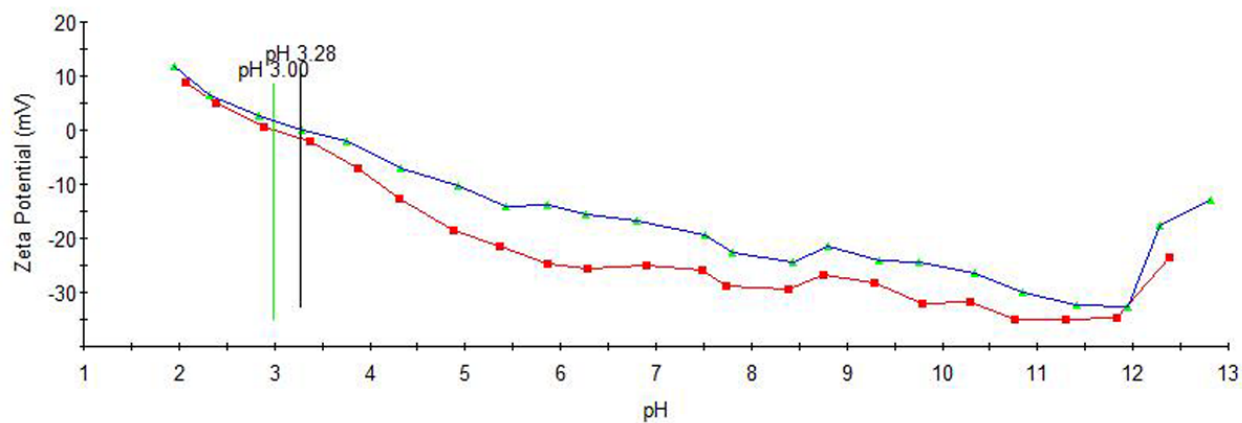

Figure S12. Fluorescence spectra of *t*-LaVO<sub>4</sub>: Gd<sup>3+</sup> nanoparticles for corresponding absorbance value of 1) > 4 2) < 1. (Experimental conditions: [cat<sup>4+</sup>]/[La<sup>3+</sup>] = 1/20, T=210°C, t=4h, pH=7). Absorption and Excitation spectra of monoclinic and tetragonal LaVO<sub>4</sub>: Gd<sup>3+</sup> nanoparticles are presented as a, a' and b, b' respectively.

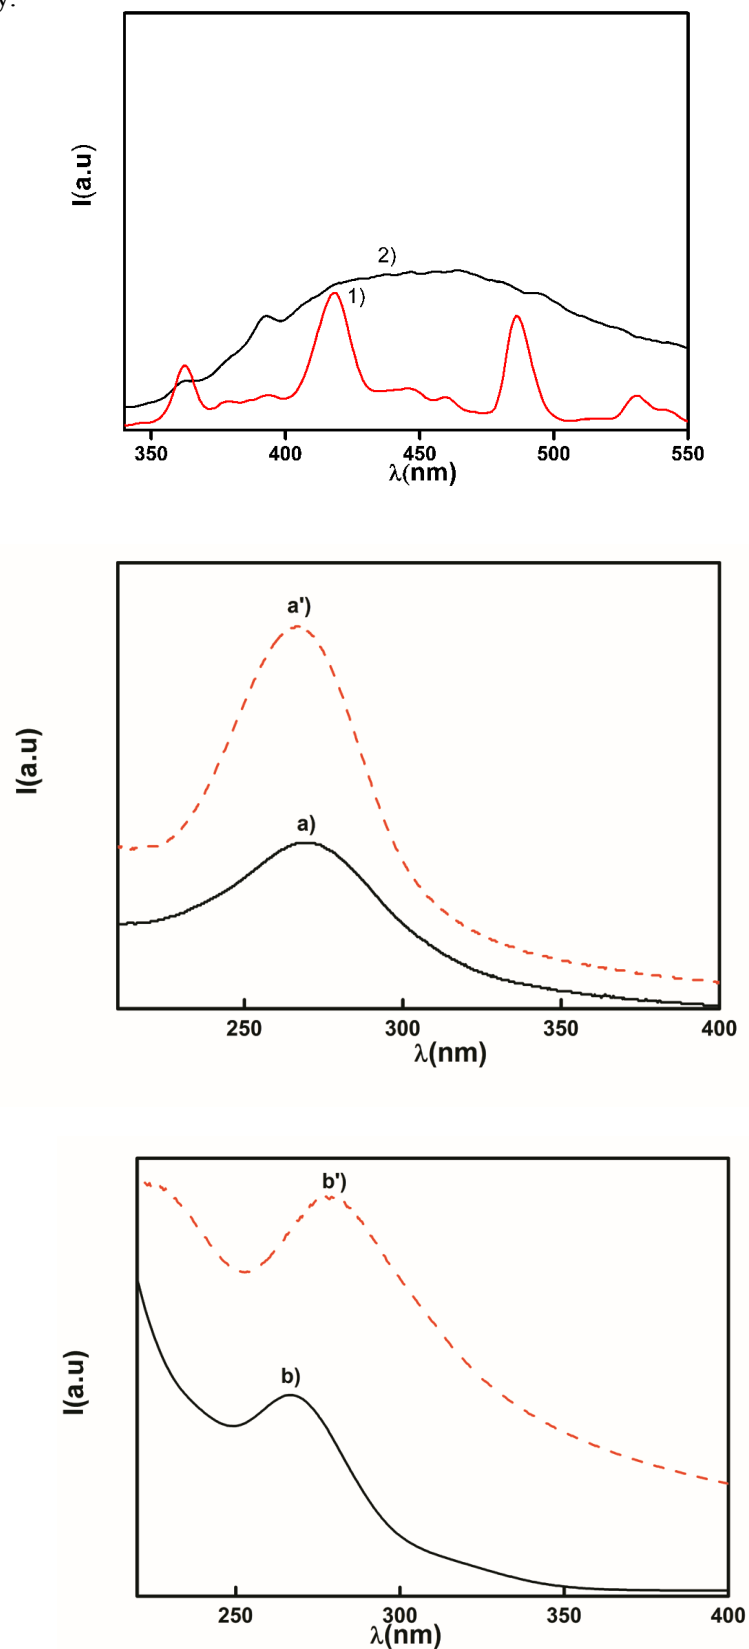

Figure S13. Magnetization curves recorded at room temperature for 1) *t*- 2) *m*-  $\text{Gd}^{3+}$  doped  $\text{LaVO}_4$  nanoparticles [Experimental conditions: 1)  $[\text{cat}^{4-}]/[\text{La}^{3+}] = 1/20, T=210^\circ\text{C}, t=4\text{h}, \text{pH}=7$ ; 2)  $[\text{cat}^{4-}]/[\text{La}^{3+}] = 0, T=210^\circ\text{C}, t=4\text{h}, \text{pH}=8$ ].

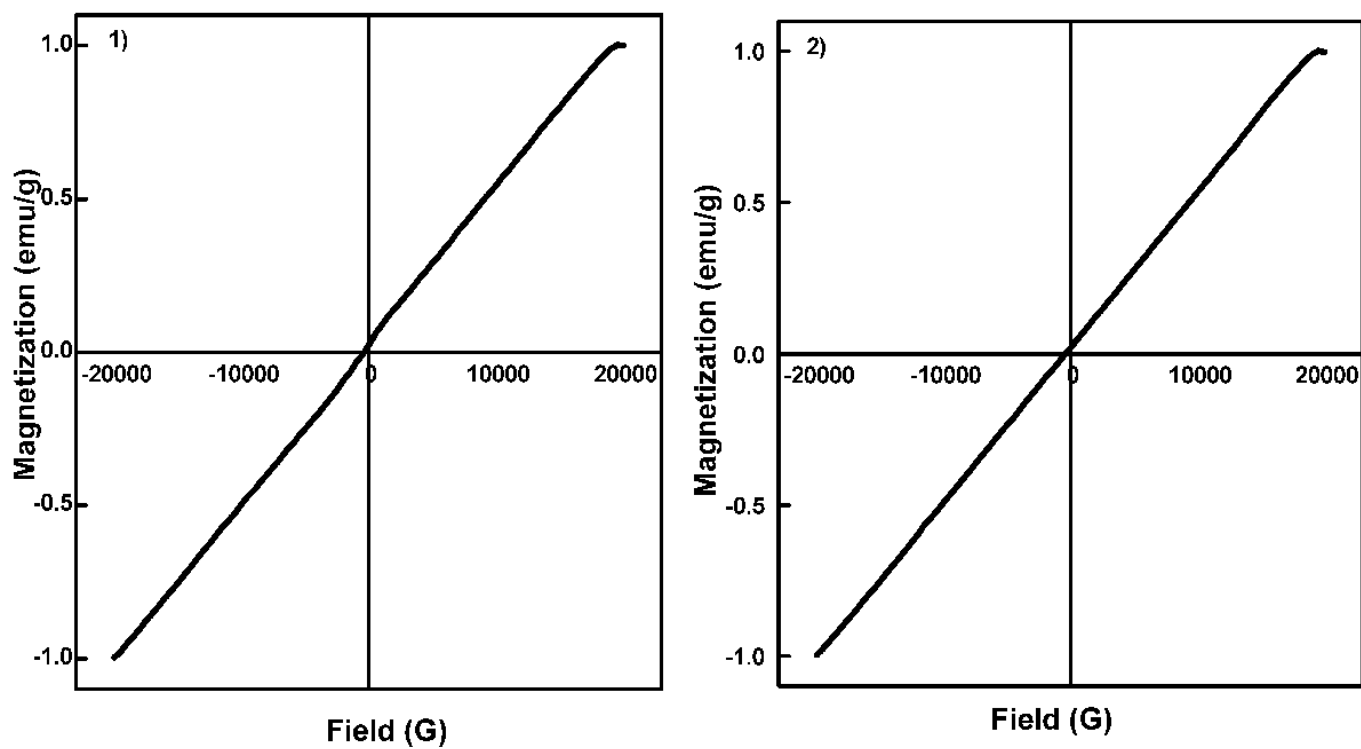

Supplement: c3ra44979c.pdf [file c3ra44979c.pdf]
